# Supplementary material
Source: publisher figshare collection journal article supplement (https://gsapubs.figshare.com/articles/dataset/_/12540383)
Supplement: Supplementary file 1 [file 1]

## Sheet: Supp DR3
DR Item 2018422 accompanies Benson, M.E., Smith, D.M., and Spaulding, S.A., 2018, Perspectives on the paleolimnology of the late Eocene Florissant lake from diatom and sedimentary evidence at Clare’s Quarry, Teller County, Colorado, USA,
in Starratt, S.W., and Rosen, M.R., eds., From Saline to Freshwater: The Diversity of Western Lakes in Space and Time: Geological Society of America Special Paper 536, https://doi.org/10.1130/2018.2536(10).
Supplement DR3: Diatom Autecology Chart
Diatom Morphological Group	Family	Genus	Identified Species	Identified Variety	Modern Analog Species	Modern Analog Variety	Abundance at Study Site	Life Form	pH Preference	Salinity Preference	Water Depth	Habitat	Optimum Water Temperature	Water Turbulence (mixing for suspension)	Trophic Status	Turbidity (cloudiness of water)	Aeration of Water	Water Conductivity (dissolved minerals - salts)	Reference 1	Reference 2	Reference 3	Reference 4	Reference 5	Reference 6	Reference 7	Reference 8	Reference 9	Reference 10
Centrics	Aulacoseiraceae	Aulacoseira	clarensis		italica	(various)	very common in some shales; uncommon to rare in others; rare in mudstones	1&8tychoplanktic	3alkaliphilous; 47.5-8.4; 57.0-7.5; 6circumneutral to moderately alkaline	3oligohalobous; 6fresh to brackish	7shallow	7lakes		2important for suspension	7mesotrophic or eutrophic				Stoermer and Julius, 2003	Lund, 1954	Hustedt, 1957	Gasse, 1986	Simola et al., 1990	Rymer et al., 1988	Van Dam et al., 1994; Trifonova and Genkal, 2001
			sp. 1		distans		rare in shales	2&3tychoplanktic	1&5acidophilous	7fresh	3shallow, 4-7 m; 2wide range	4&7smaller lakes	610.89 to 12.15°C	8important for suspension	5oligotrophic				Michelutti et al., 2007	Moos et al., 2005	Laird and Cumming, 2008	Florin, 1981; Camburn and Kingston, 1986; Haworth, 1988; Siver and Kling, 1997	Leira, 2005	Weckstrom et al., 1997	McLaren et al., 2014	Liu and Shi, 1989; Thienpont et al., 2008
	Orthoseiraceae	Orthoseira	roeseana		roeseana		uncommon in mudstones; rare in shales	1bryophytic; 2xerotic	1alkaliphilous			1subaerial							Patrick and Reimer, 1966; Stoermer and Julius, 2003	Germain, 1981
	Heliopeltaceae	Actinoptychus	sp. 1		senarius = undulatus		very rare, single specimen in mudstone	2benthic & planktic		1brackish-brackish marginal marine; 3freshwater									Van Eetvelde and Dupuis, 2004	Cupp, 1943	Essien et al., 2008
Araphid Pennates	Fragilariaceae	Fragilaria	vaucheriae	lohmanii	vaucheriae		rare in shales; rare in mudstones	1&8&10benthic	8alkalibiontic, 8.0-9.4; 96.0-9.5	7fresh	2offshore or 3nearshore	2&3&4lakes, streams	7cool	5reduced current flow	6eutrophic	9very low			Kingston, 2003	Stoermer and Yang, 1970	Stoermer, 1968	Van de Vijver et al., 2001	Ki et al., 2009	Hoagland and Peterson, 1990	Patrick and Reimer, 1966	Castenholz, 1960	Johnson et al., 2009	Tuji, 2000
		Staurosira	morphotype 1		construens	venter	uncommon in some shales; rare in other shales and mudstones	1benthic & planktic	3neutral; 4circumneutral to moderately alkaline	3fresh; 4fresh to brackish	1shallow	1rivers, lakes			2oligotrophic or mesotrophic				Kingston, 2003	Patrick and Reimer, 1966	Gasse, 1986	Rymer et al., 1988
			morphotype 2		incerta		very uncommon in shales	2benthic & planktic	1alkaliphilous		2shallow	2rivers, lakes			1oligotraphentic (favoring nutrient-poor conditions)				Morales, 2006	Kingston, 2003
		Diatoma	tenuis		tenuis		very common in some shales; common to rare in other shales; uncommon in mudstones	3&4benthic (3periphyton) (4epiphytic); 3&4planktic	5alkalibiontic, 8.0-9.4	1high tolerance for Na; 2fresh to brackish		1lakes; 3benthic (periphyton) in lakes in spring & autumn						1high tolerance for conductivity	Potapova and Charles, 2003	Williams, 1985	Moss, 1981	Krammer and Lange-Bertalot, 2004	Castenholz, 1960
		Synedra					very common in shales and mudstones	1benthic (3periphyton) ; 2planktic	4moderately alkaline			1benthic in rivers; 2planktic in lakes in spring; 3benthic (periphyton) in lakes in spring & autumn			2oligotrophic, mesotrophic, and eutrophic				Main, 1988	Stoermer and Yang 1970; Agbeti and Smol, 1995; Agbeti et al., 1997	Moss, 1981	Rymer et al., 1988
			sp. 1		ulna		very common in shales and mudstones	1&3benthic & planktic	5circumneutral to moderately alkaline; 6alkalibiontic, 8.0-9.4	5fresh to brackish		2&3lakes; 4rivers			2oligotrophic, mesotrophic, and eutrophic				Kingston, 2003	Stoermer and Yang 1970; Agbeti and Smol, 1995; Agbeti et al., 1997	Moss, 1981	Main, 1988	Rymer et al., 1988	Castenholz, 1960
					acus			2benthic (periphyton) & planktic	1alkalibiontic, 8.0-9.4		3shallow	3rivers; 4lakes			2oligotrophic, 3enriched	3high	3well-ventilated		Kingston, 2003	Bradbury, 1975	Reynolds et al., 2002	Castenholz, 1960
	Tabellariaceae	Tetracyclus					rare in shales and mudstones	3benthic		2fresh	1shallow	2lakes, rivers	1&3cold		2&3oligotrophic				Patrick and Reimer, 1966	Kociolek et al., 2015	Michel et al., 2006
			sp. 1 aff. T. polygibbum		hinziae		rare in shales	1benthic aerophilous, bryophytic		1fresh		1streams	1cold		1oligotrophic				Bishop and Spaulding, 2015
			sp. 2 aff. T. elliptica or ellipticus				rare in mudstones
			sp. 3 aff. T. lata				rare in shales
			sp. 4 aff. T. rhombus				rare in shales
			sp. 5 aff. T. lancea				rare in mudstones
Raphid Pennates	Eunotiaceae	Eunotia					rare in shales and mudstones	1benthic; 2aerophytic	2alkaline, circumneutral, highly acidic			2lakes, streams		2turbulent and still	1oligotrophic and eutrophic			1elevated sulfate	Kociolek and Spaulding, 2003	Kingston, 2003
	Gomphonemataceae	Gomphonema					uncommon in shales; rare in mudstones	1benthic; 2 some, epiphytic & some, planktic	1wide range		1shallow	1&2lakes, streams		1some, low flow streams; 2some, high-flow streams		1low			Kociolek and Spaulding, 2003	Patrick and Reimer, 1966
Monoraphid Pennates	Achnanthidiaceae	Achnanthidium					rare in shales	1benthic; 2stipitate, epiphytic, episammic, epilithic	5alkaline	1fresh	1shallow to mid-depth	1&7 lakes, 1rivers		2&3&4turbulent		6low	2&3well-oxygenated water		Stoermer, 1980	Kingston, 2003	Cholnoky, 1968	Peterson and Hoagland, 1990; Peterson and Stevenson, 1992	Potapova and Charles, 2003; Castenholz, 1960	Johnson et al., 2009	Brown, 1973; Kingston, 1980
		Planothidium					rare in shales and mudstones	3benthic; 1epiphytic, episammic, epilithic	2alkaline	3fresh	3shallow to mid-depth	3lakes, rivers							Kingston, 2003	Bukhtiyarova and Round, 1996	Stoermer, 1980
		Platessa	florissantia		P. conspicua = Achnanthes conspicua		rare in shales	4benthic; 3epiphytic, episammic, epilithic	1low alkalinity; 2circumneutral to mildly alkaline, 7-8.5	4fresh	4shallow to mid-depth	4lakes, rivers			1oligotrophic to eutrophic			1moderate to abundant	Krammer and Lange-Bertalot, 2004	Johnson et al., 2009	Kingston, 2003	Stoermer, 1980
		Psammothidium					extremely rare in shales	2benthic; 3epiphytic, episammic, epilithic	1acidic	2fresh	2shallow to mid-depth	2lakes, rivers							Flower and Jones, 1989; Bukhtiyarova and Round, 1996	Stoermer, 1980	Kingston, 2003
Biraphid Pennates	Diadesmidaceae	Diadesmis					rare in mudstones	1aerophytic bryophytic	1sli. acidic						2oligotrophic			1low	Kociolek and Spaulding, 2003	Patrick and Reimer, 1966
	Amphipleuraceae	Frustulia	coloradensis		amphipleuroides		rare in shales and mudstones	1&2benthic;1bryophytic	1&2sli. acidic									1&2low	Patrick and Reimer, 1966	Kociolek and Spaulding, 2003
	Pinnulariaceae	Pinnularia					rare in mudstones	2aerophytic	1sli. acidic									1low	Kociolek and Spaulding, 2003	Lakatos et al., 2004
	Naviculaceae	Adlafia	tellerensis		muscora		rare in shales	1aerophytic bryophytic											Moser, Lange-Bertalot, and Metzeltin, 1998
					suchlandtii			1aerophytic bryophytic											Moser, Lange-Bertalot, and Metzeltin, 1998
		Navicula	eomenisculus		menisculus		rare in shales and mudstones	2benthic	1alkaline	1fresh		1lakes, streams		3low	1mesotrophic to moderately eutrophic				Lange-Bertalot, 2001	Hoagland et al., 1982	Kociolek and Spaulding, 2003
	Stauroneidaceae	Stauroneis					rare in shales	1benthic & planktic; 2aerophytic	2alkaline			1lakes, streams							Kociolek and Spaulding, 2003	Lakatos et al., 2004
Keeled Pennates	Bacillariaceae	Nitzschia					rare in shales and mudstones	1epipelic, planktic, epilithic & epiphytic; 2bryophytic	3moderately alkaline, 8.0 – 9.4			1slow streams, lakes, ponds, wetlands		1low					Lowe, 2003	Patrick and Reimer, 1966	Castenholz, 1960
Note: Light pink shading indicates modern analog autecology at the genus level; white indicates modern analog autecology at species or variety level.
References
Agbeti and Smol, 1995			Agbeti, M.D., and Smol, J.P., 1995, Winter limnology—A comparison of physical, chemical, and biological characteristics in two temperate lakes during ice cover: Hydrobiologia 304, p. 221-234.
Agbeti et al., 1997			Agbeti, M.D., Kingston, J.C., Smol, J.P., and Watters, C., 1997, Comparison of phytoplankton succession in two lakes of different mixing regimes: Archiv für Hydrobiologie 140, p. 37-69.
Bishop and Spaulding, 2015			Bishop, I.W., and Spaulding, S.A., 2015, Tetracyclus hinziae (Bacillariophyta), a new species from the central Cascade Mountains (Washington, USA): Phytotaxa v. 205, no. 3, p. 197-204.
Bradbury, 1975			Bradbury, J.P., 1975, Diatom stratigraphy and human settlement in Minnesota: Geological Society of America Special Paper 171.
Brown, 1973			Brown, S.-D., 1973, Species diversity of periphyton communities in the littoral of a temperate lake: Internationale Revue der Gesamten Hydrobiologie 58, p. 787-800.
Bukhtiyarova and Round, 1996			Bukhtiyarova, L., and Round, F.E., 1996, Revision of the genus Achnanthes sensu lato. Psammothidium, a new genus based on A. marginulatum: Diatom Research 11, p. 1-30.
Camburn and Kingston, 1986			Camburn, K.E., and Kingston, J.C., 1986, The genus Melosira from soft-water lakes with special reference to northern Michigan, Wisconsin and Minnesota, in Smol, J.P., Battarbee, R.W., Davis, R.B., and Merilainen, J.A., eds., Diatoms and lake acidity: Dordrecht, W. Junk Publishers, p. 17-34.
Castenholz, 1960			Castenholz, R.W., 1960, Seasonal changes in the attached algae of freshwater and saline lakes in the Lower Grand Coulee, Washington: Limnology and Oceanography 5, p. 1-28.
Cholnoky, 1968			Cholnoky, B.J., 1968, Die Ökologie der Diatomeen in Binnengewässern: Lehre, J. Cramer Verlag, 699 p.
Cupp, 1943			Cupp, E.E., 1943, Marine plankton diatoms of the west coast of North America: Berkeley, California, University of California Press, 238 p.
Essien et al., 2008			Essien, J.P., Antai, S.P., and Benson, N.U., 2008, Microalgae biodiversity and biomass status in Qua Iboe Estuary mangrove swamp, Nigeria: Aquatic Ecology 42, p. 71-81.
Florin, 1981			Florin, M.-B., 1981, The taxonomy of some Melosira species—A comparative morphological study, in Ross, R., ed., II. Proceedings of the 6th International Symposium on Recent and Fossil Marine Diatoms, Budapest, 1980: Koenigstein, Koeltz, p. 43-67.
Flower and Jones, 1989			Flower, R.J., and Jones, V.J., 1989, Taxonomic descriptions and occurrences of new Achnanthes taxa in acid lakes in the United Kingdom: Diatom Research 4, p. 227-239.
Gasse, 1986			Gasse, F., 1986, East Africa diatoms—Taxonomy, ecological distribution: Bibliotheca Diatomologica 11, 201 p.
Germain, 1981			Germain H., 1981, Flore des diatomées Diatomophycées eaux douces et saumâtres du Massif Armoricain et des contrées voisines d’Europe occidentale: Paris, Société Nouvelle des Éditions Boubée, 444 p.
Haworth, 1988			Haworth, E.Y., 1988, Distribution of diatom taxa of the old genus Melosira (now mainly Aulacoseira) in Cumbrian waters, in Round, F.E., ed., Algae and the aquatic environment: Bristol, Biopress, p. 138-167.
Hoagland et al., 1982			Hoagland, K.D., Roemer, S.C., and Rosowski, J.R., 1982, Colonization and community structure of two periphyton assemblages, with emphasis on the diatoms (Bacillariophyceae): American Journal of Botany 69, p. 188-213.
Hoagland and Peterson, 1990			Hoagland, K.D., and Peterson, C.G., 1990, Efforts of light and wave disturbance on vertical zonation of attached microalgae in a large reservoir: Journal of Phycology 26, p. 450-457.
Hustedt, 1957			Hustedt, F., 1957, Die diatomeen flora des Fluss-systems der Weser im gebiet der Hansestadt Bremen: Abhandlungen des Naturwissenschaftlichen Vereins zu Bremen, v. 34, no. 3, p. 181-440.
Johnson et al., 2009			Johnson, T., Hermann, K., Spaulding, S., Beyea, B., Theel, C., Sada, R., Bollman, W., Bowman, J., Larsen, A., Vining, K., Ostermiller, J., Petersen, D. Hargett, E., and Zumberge, J., 2009, An ecological assessment of USEPA Region 8 streams and rivers: U.S. Environmental Protection Agency Region 8 Report, 178 p.
Ki et al., 2009			Ki, J.-S., Cho, S.-Y., Katano, T., Jung, S.W., Lee, J., Park, B.S., and Han, M.-S., 2009, Comprehensive comparisons of three pennate diatoms, Diatoma tenuae, Fragilaria vaucheriae, and Navicula pelliculosa, isolated from summer Arctic reservoirs (Svalbard 79°N), by fine-scale morphology and nuclear 18S ribosomal DNA: Polar Biology 32, p. 147-159.
Kingston, 1980			Kingston, J.C., 1980, Characterization of benthic diatom communities in Grand Traverse Bay, Lake Michigan. PhD dissertation, Bowling Green State University, Bowling Green, Ohio, 411 p.
Kingston, 2003			Kingston, J.C., 2003, Araphid and monoraphid diatoms, in Wehr, J.D., and Sheath, R.G., eds., Freshwater algae of North America—Ecology and classification: New York, Academic Press, p. 595-636.
Kociolek and Spaulding, 2003			Kociolek, J.P., and Spaulding, S.A., 2003, Symmetrical Naviculoid diatoms, in Wehr, J.D., and Sheath, R.G., eds., Freshwater algae of North America—Ecology and classification: New York, Academic Press, p. 637-668.
Kociolek et al., 2015			Kociolek, J.P., Theriot, E.C., Williams, D.M., Julius, Matthew, Stoermer, E.F., and Kingston, J.C., 2015, Chapter 15. Centric and araphid diatoms, in Wehr, J.D., Sheath, R.G., and Kociolek, J.P., Freshwater algae of North America—Ecology and classification, 2nd edition: Amsterdam, Elsevier, p. 653-694.
Krammer and Lange-Bertalot, 2004			Krammer, K., and Lange-Bertalot, H., 2004, Band 2. Bacillariophyceae, 4. Teil: Achnanthaceae, Kristische Ergänzungen zu Achnanthes s. l., Navicula s. str., Gomphonema, in Ettl, H., Gerloff, J., Heynig, H., and Mollenhauer, D., eds., Süsswasserflora von Mitteleuropa 2/4: München, Elsevier Gesellschaft mit beschränkter Haftung, 468 p.
Laird and Cumming, 2008			Laird, K.R., and Cumming, B.F., 2008, Diatom-inferred lake level from near-shore cores in a drainage lake from the Experimental Lakes area, northwest Ontario, Canada: Journal of Paleolimnology, doi 10.1007/s10933-008-9248-9, Queen’s University Web site: http://webcache.googleusercontent.com/search?q=cache:7stiJmCtvXwJ:post.queensu.ca/~pearl/drought/Laird%2520and%2520Cumming%2520JoPL%25202008.pdf+…
Lakatos et al., 2004			Lakatos, M., Lange-Bertalot, H., and Büdel, B., 2004, Diatoms living inside the thallus of the green algal lichen Coenogonium linkii in neotropical lowland rain forests: Journal of Phycology 40, p. 70-73.
Lange-Bertalot, 2001			Lange-Bertalot, H., 2001, Navicula sensu stricto, 10 genera separated from Navicula sensu lato, Frustulia, in Lange-Bertalot, H., ed., Diatoms of Europe—Diatoms of the European inland waters and comparable habitats, v. 2: Ruggell, A.R.G. Gantner Verlag Kommanditgesellschaft, 526 p.
Leira, 2005			Leira, M., 2005, Diatom responses to Holocene environmental changes in a small lake in northwest Spain: Quaternary International 140, p. 90-102.
Liu and Shi, 1989			Liu, H.F., and Shi L., 1989, Paleomagnetic study of Shanwang Formation, Shandong Province: Acta Scientiarum Naturalium, Universitatis Pekinensis 25, p. 585-593.
Lowe, 2003			Lowe, R.L., 2003, Keeled and canalled raphid diatoms, in Wehr, J.D., and Sheath, R.G., eds., Freshwater algae of North America—Ecology and classification: New York, Academic Press, p. 669-684.
Lund, 1954			Lund, J.W.G., 1954, The seasonal cycle of the plankton diatom Melosira italica (Ehr.) Kütz. subsp. subarctica O. Müll.: Journal of Ecology 42, p. 151-179.
Main, 1988			Main, S.P., 1988, Seasonal composition of benthic diatom associations in the Cedar River basin (Iowa): Journal of the Iowa Academy of Sciences 96, p. 85-105.
McLaren et al., 2014			McLaren, D., Fedje, D., Hay, M.B., Mackie, Q., Walker, I.J., Shugar, D.H., Eamer, J.B.R., Lian, O.B., and Neudorf, C., 2014, A post-glacial sea level hinge on the central Pacific coast of Canada: Quaternary Science Reviews 97, p. 148-169.
Michel et al., 2006			Michel, T.J., Saros, J.E., Interlandi, S.J., and Wolfe, A.P., 2006, Resource requirements of four freshwater diatom taxa determined by in situ growth bioassays using natural populations from alpine lakes: Hydrobiologia, v. 568, no. 1, p. 235-243.
Michelutti et al., 2007			Michelutti, N., Wolfe, A.P., Briner, J.P., and Miller, G.H., 2007, Climatically controlled chemical and biological development in Arctic lakes: Journal of Geophysical Research 112, G03002, doi:10.1029/2006JG000396.
Moos et al., 2005			Moos, M.T., Laird, K.R., and Cumming, B.F., 2005, Diatom assemblages and water depth in Lake 239 (Experimental Lakes Area, Ontario)—Implications for paleoclimatic studies: Journal of Paleolimnology 34, p. 217-227.
Morales, 2006			Morales, E.A., 2006, Staurosira incerta (Bacillariophyceae) a new fragilarioid taxon from freshwater systems in the United States with comments on the structure of girdle bands in Staurosira Ehrenberg and Staurosirella Williams et Round, in Ognjanova-Rumenova, N., and Manoylov, K., eds., Advances in phycological studies: Sofia, Moscow, Pensoft Publisher & University Publishing House, p.133-145.
Moser, Lange-Bertalot, and Metzeltin, 1998			Moser, G., Lange-Bertalot, H., and Metzeltin, D., 1998, Insel der Endemiten. Geobotanisches Phänomen Neukaledonien: Bibliotheca Diatomologica 38, 464 p.
Moss, 1981			Moss, B., 1981, The composition and ecology of periphyton communities in freshwaters. II. Inter-relationships between water chemistry, phytoplankton populations and periphyton populations in a shallow lake and associated experimental reservoirs (‘Lund tubes”): British Phycological Journal 16, p. 59-76.
Patrick and Reimer, 1966			Patrick, Ruth, and Reimer, C.W., 1966, The diatoms of the United States, exclusive of Alaska and Hawaii, v. 1., Fragilariaceae, Eunotiaceae, Achnanthaceae, Naviculaceae: Monographic Series of the Academy of Natural Sciences of Philadelphia 13, 688 p.
Peterson and Hoagland, 1990			Peterson, C.G., and Hoagland, K.D., 1990, Effects of wind-induced turbulence and algal mat development on epilithic diatom succession in a large reservoir: Archiv für Hydrobiologie 118, p. 47-68.
Peterson and Stevenson, 1992			Peterson, C.G., and Stevenson, R.J., 1992, Resistance and resilience of lotic algal communities—Importance of disturbance timing and current: Ecology 73, p. 1445-1461.
Potapova and Charles, 2003			Potapova, M., and Charles, D.F., 2003, Distribution of benthic diatoms in U.S. rivers in relation to conductivity and ionic composition: Freshwater Biology 48, p. 1311-1328.
Reynolds et al., 2002			Reynolds, C.S., Huszar, Vera, Kruk, Carla, Naselli-Flores, Luigi, and Melo, Sergio, 2002, Towards a functional classification of the freshwater phytoplankton: Journal of Plankton Research, v. 24, no. 5, p. 417-428.
Rymer et al., 1988			Rymer, M.J., Roth, B., Bradbury, J.P., and Forester, R.M., 1988, Depositional environments of the Cache, Lower Lake, and Kelseyville Formations, Lake County, California: Geological Society of America Special Paper 214, p. 45-61.
Simola et al., 1990			Simola, H., Hanski, I., and Liukkonen, M., 1990, Stratigraphy, species richness and seasonal dynamics of plankton diatoms during 418 years in Lake Lovojärvi, South Finland: Annales Botanici Fennici, v. 27, no. 3, p. 241-259.
Siver and Kling, 1997			Siver, P.A., and Kling, H., 1997, Morphological observations of Aulacoseira using scanning electron microscopy: Canadian Journal of Botany 75, p. 1807-1835.
Stoermer, 1968			Stoermer, E.F., 1968, Nearshore phytoplankton population in the Grand Haven, Michigan vicinity during thermal bar conditions: Proceedings of the 11th Conference on Great Lakes Research, p. 137-150.
Stoermer, 1980			Stoermer, E.F., 1980, Characteristics of benthic algal communities in the upper Great Lakes: U.S. Environmental Protection Agency, Ecological Research Series EPA 600/3-80-073, Environmental Research Laboratory, Duluth, Minnesota, p. 1-73.
Stoermer and Julius, 2003			Stoermer, E.F., and Julius, M.L., 2003, Centric diatoms, in Wehr, J.D., and Sheath, R.G., eds., Freshwater algae of North America—Ecology and classification: New York, Academic Press, p. 559-594.
Stoermer and Yang, 1970			Stoermer, E.F., and Yang, J.J., 1970, Distribution and relative abundance of dominant plankton diatoms in Lake Michigan: Great Lakes Research Division Publication 16, University of Michigan, Ann Arbor, 64 p.
Thienpont et al., 2008			Thienpont, J.R., Ginn, B.K., Cumming, B.F., and Smol, J.P., 2008, An assessment of environmental changes in three lakes from King’s County (Nova Scotia, Canada) using diatom-based paleolimnological techniques: Water Quality Research Journal of Canada, v. 43, no. 2/3, p. 85-98.
Trifonova and Genkal, 2001			Trifonova, I., and Genkal, S., 2001, Species of the genus Aulacoseira Thwaites in lakes and rivers of north-western Russia—Distribution and ecology, in Economou-Amilli, A., ed., Proceedings of the 16th International Diatom Symposium, Athens and Aegean Islands: Athens, Greece, University of Athens, p. 315–323.
Tuji, 2000			Tuji, A., 2000, Observation of developmental processes in loosely attached diatom (Bacillariophyceae) communities: Phycological Research 48, p. 75-84.
Van Dam et al., 1994			Van Dam, H., Mertens, A., Sinkeldam, J., 1994, A coded checklist and ecological indicator values of freshwater diatoms from the Netherlands: Netherlands Journal of Aquatic Ecology 28, 117–133.
Van de Vijver et al., 2001			Van de Vijver, B., Ledeganck, P., and Beyens, L., 2001, Habitat preferences in freshwater diatom communities from sub-Antarctic Îles Kerguelen: Antarctic Science, v. 13, no. 1, p. 28-36.
Van Eetvelde and Dupuis, 2004			Van Eetvelde, Y., and Dupuis, C., 2004, Upper Paleocene and Lower Eocene interval in the Dieppe-Hampshire Basin—Biostratigraphic analysis based on pyritized diatoms, in Beaudoin, A.B., and Head, M.J., eds., The palynology and micropaleontology of boundaries: Geological Society [London] Special Publication 230, p. 275-291.
Weckstrom et al., 1997			Weckstrom, J., Korhola, A., and Blom, T., 1997, Diatoms as quantitative indicators of pH and water temperature in subarctic Fennoscandian lakes: Hydrobiologia 347, p. 171-184.
Williams, 1985			Williams, D.M., 1985, Morphology, taxonomy and inter-relationships of the ribbed araphid diatoms from the genera Diatoma and Meridion (Diatomaceae: Bacillariophyta): Bibliotheca Diatomologica 8, 228 p.
